# Supplementary material for: A ketogenic diet can mitigate SARS-CoV-2 induced systemic reprogramming and inflammation
Source: PubMed Central journal article supplement (PMC10624922; doi:10.1038/s42003-023-05478-7), 2023-11-03
Supplement: 42003_2023_5478_MOESM1_ESM.pdf [file 42003_2023_5478_MOESM1_ESM.pdf]

# Supplementary Information to

## A ketogenic diet can mitigate SARS-CoV-2 induced systemic reprogramming and inflammation

Amelia Palermo<sup>1,2,3,4</sup>, Shen Li<sup>5,6,7,8,9,10</sup>, Johanna ten Hoeve<sup>2,3,4</sup>, Akshay Chellappa<sup>1</sup>, Alexandra Morris<sup>1</sup>, Barbara Dillon<sup>11</sup>, Feiyang Ma<sup>12</sup>, Yijie Wang<sup>6,7,8,9,10</sup>, Edward Cao<sup>6,7,8,9,10</sup>, Byourak Shabane<sup>13</sup>, Rebeca Acín-Perez<sup>13</sup>, Anton Petcherski<sup>13</sup>, A. Jake Lusic<sup>1,5</sup>, Stanley Hazen<sup>14</sup>, Orian S Shirihai<sup>1,13</sup>, Matteo Pellegrini<sup>7,8,9</sup>, Vaithilingaraja Arumugaswami<sup>1,8</sup>, Thomas G. Graeber<sup>1,2,3,4,8\*</sup>, Arjun Deb<sup>2,5,6,7,8,9\*</sup>

\*Corresponding authors

<sup>†</sup>These authors contributed equally

<sup>1</sup>Department of Molecular and Medical Pharmacology, David Geffen School of Medicine, University of California, Los Angeles CA 90095, <sup>2</sup>California Nanosystems Institute, University of California, Los Angeles, CA 90095, <sup>3</sup>UCLA Metabolomics Center, University of California, Los Angeles, <sup>4</sup>Crump Institute for Molecular Imaging, University of California, Los Angeles, <sup>5</sup>Division of Cardiology, Department of Medicine, David Geffen School of Medicine, University of California, Los Angeles, CA 90095, <sup>6</sup>UCLA Cardiovascular Research Theme, David Geffen School of Medicine, University of California, Los Angeles, CA 90095, <sup>7</sup>Department of Molecular, Cell and Developmental Biology, Division of Life Sciences, University of California, Los Angeles, CA 90095, <sup>8</sup>Eli & Edythe Broad Center of Regenerative Medicine and Stem Cell Research, University of California, Los Angeles, CA 90095, <sup>9</sup>Molecular Biology Institute, University of California, Los Angeles, CA 90095, <sup>10</sup>Department of Genetics, David Geffen School of Medicine, Los Angeles, CA 90095, <sup>11</sup>Department of Environment, Health and Safety, University of California, Los Angeles, CA 90095, <sup>12</sup>Division of Rheumatology, Department of Internal Medicine, University of Michigan, Ann Arbor, Michigan, USA 48109, <sup>13</sup>Department of Medicine, Endocrinology, David Geffen School of Medicine, University of California, Los Angeles, CA 90095, USA, <sup>14</sup>Department of Cardiovascular and Metabolic Sciences, Cleveland Clinic, Cleveland, OH 44195.

## INDEX

**Supplementary Figure 1.** Schematization of ketogenic metabolism.

**Supplementary Figure 2.** Glucose,  $\beta$ -hydroxybutyrate (BHB) and body weight in KD for WT, hACE2+ mice.

**Supplementary Figure 3.** Principal component analysis, volcano plot and GO enrichment analysis of RNA-sequencing data (liver) in hACE2+ KD vs hACE2+ CD uninfected mice.

**Supplementary Figure 4.** Glucose and BHB in serum in hACE2+ CD or hACE2+ KD infected mice.

**Supplementary Figure 5.** PPAR $\alpha$  gene set enrichment, acylcarnitine (liver), TRRUST analysis, serum BHB at day 7 from infection in hACE2+ CD mice.

**Supplementary Figure 6.** GO enrichment analysis of RNA-sequencing data (heart) in hACE2+ KD vs hACE2+ infected mice.

**Supplementary Figure 7.** Principal component analysis of metabolomics (heart, serum, kidney, liver) in hACE2+ CoV-2 infected and control mice in KD or CD.

**Supplementary Figure 8.** Seahorse analysis supplementary data.

**Supplementary Figure 9.** Uncropped seahorse immunoblots.

**Supplementary Figure 10.** NLRP3 inflammasome transcriptional gene set analysis for infected mice under CD or KD.

Ketogenesis

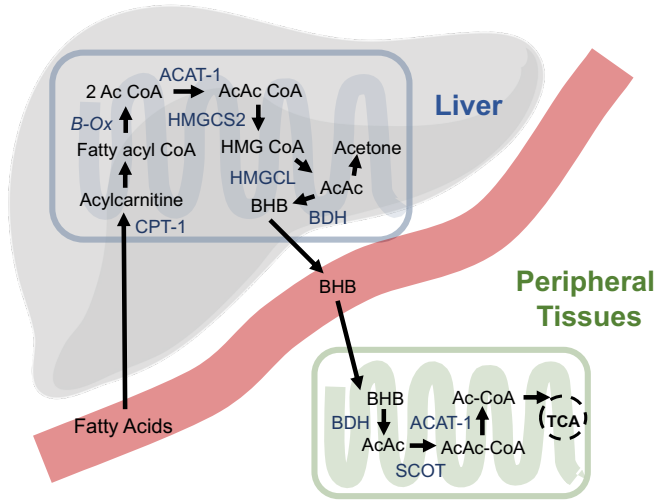

Ketolysis

Supplementary Figure 1. Schematization of ketogenic metabolism.

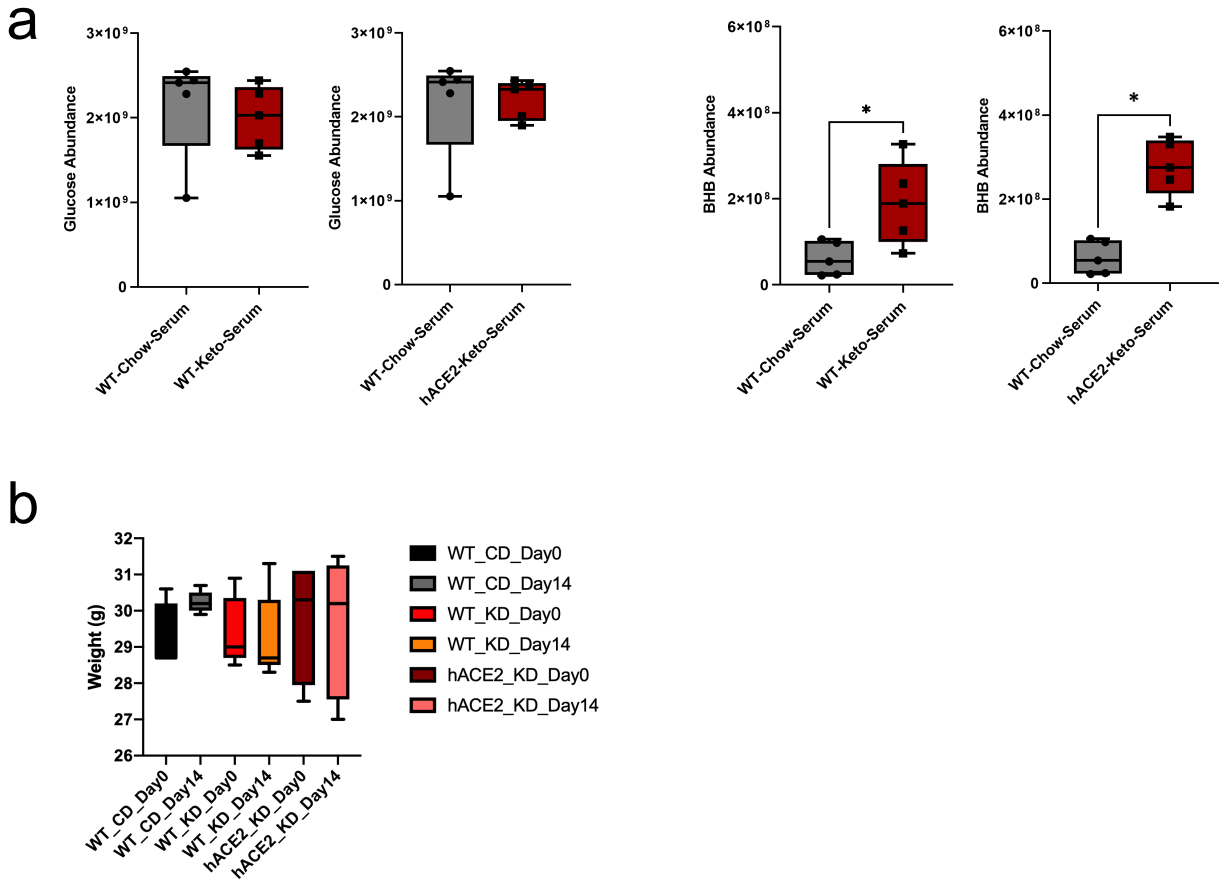

**Supplementary Figure 2. a)** glucose and  $\beta$ -hydroxybutyrate (BHB) abundance in CD, KD WT and hACE2+ KD mice in serum (\* for significance  $p < 0.05$ ,  $n=5/\text{group}$ ); **b)** Body weight changes during KD induction in WT and hACE2+ mice, and CD control (followed over 2 weeks of diet).

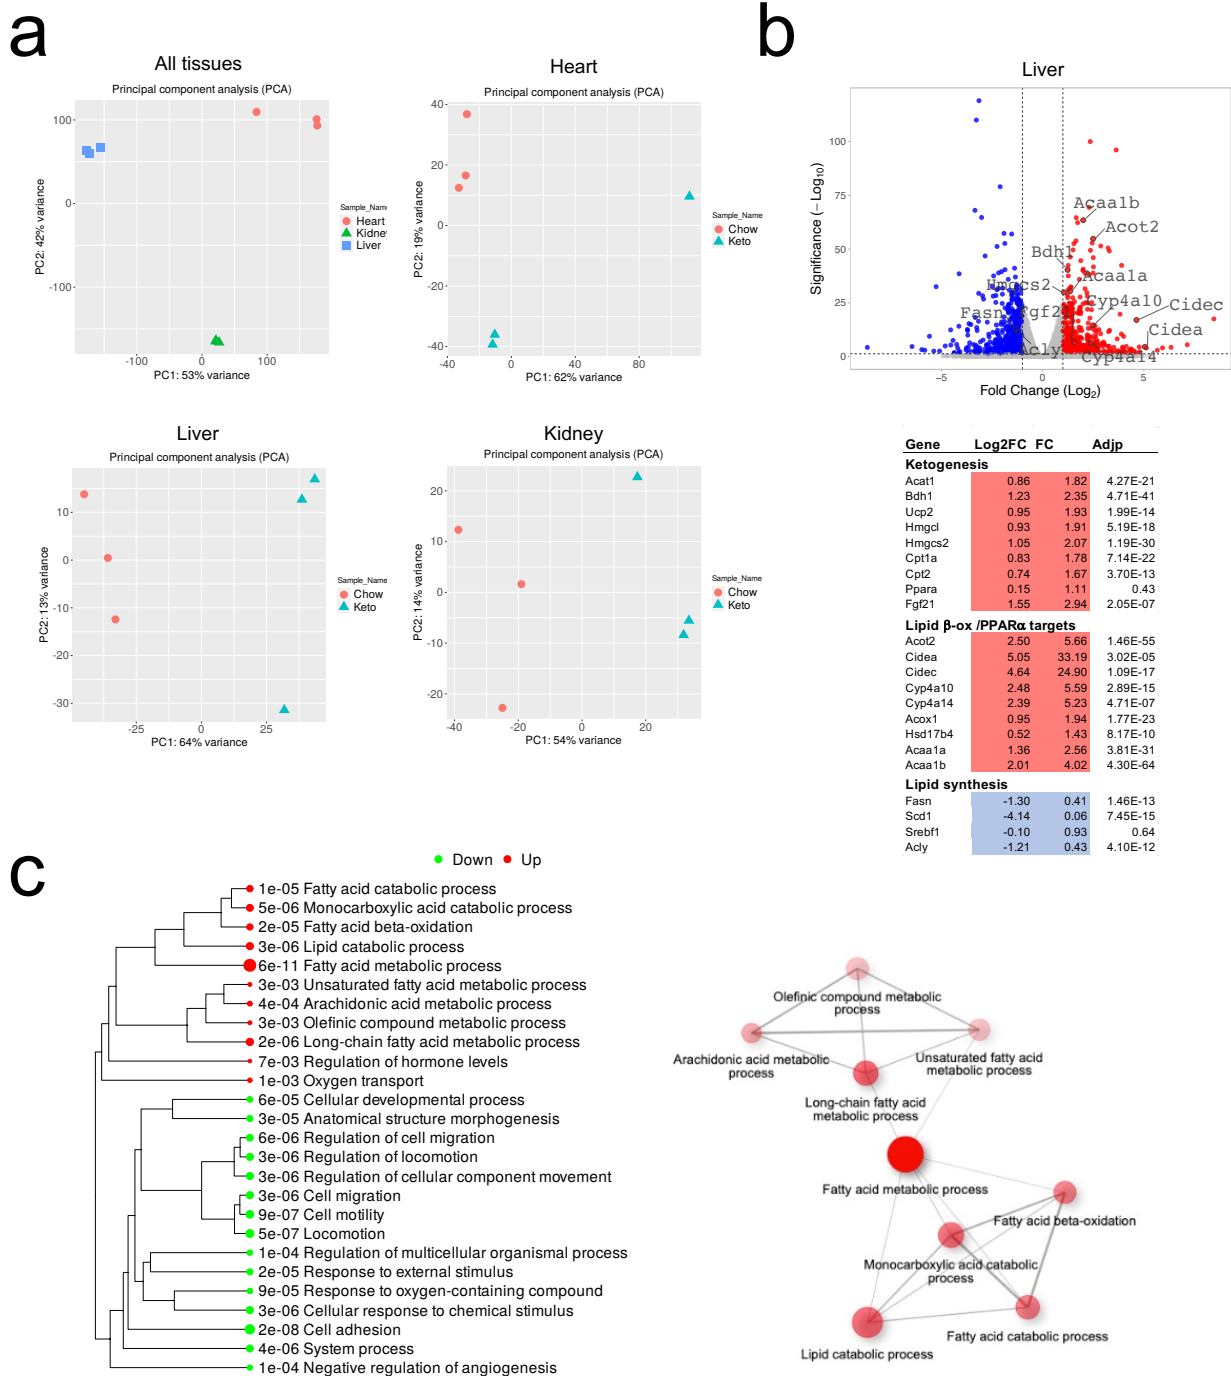

**Supplementary Figure 3. a)** principal component analysis of RNA-seq data for heart, liver and kidney in hACE2+ mice under CD or KD (both uninfected); **b)** volcano plot of differentially regulated genes in hACE2+ KD vs hACE2+ CD mice (both uninfected) and table showing log2FC

and adjusted p values for up- and down-regulated genes in the ketogenesis, lipid  $\beta$ -oxidation/PPAR- $\alpha$  targets and lipid synthesis pathways; **c)** GO gene set network enrichment analysis of differentially regulated genes in RNA-sequencing data (liver) in hACE2+ KD Mock vs hACE2+ CD Mock mice (red, upregulated pathways, green, downregulated pathways).

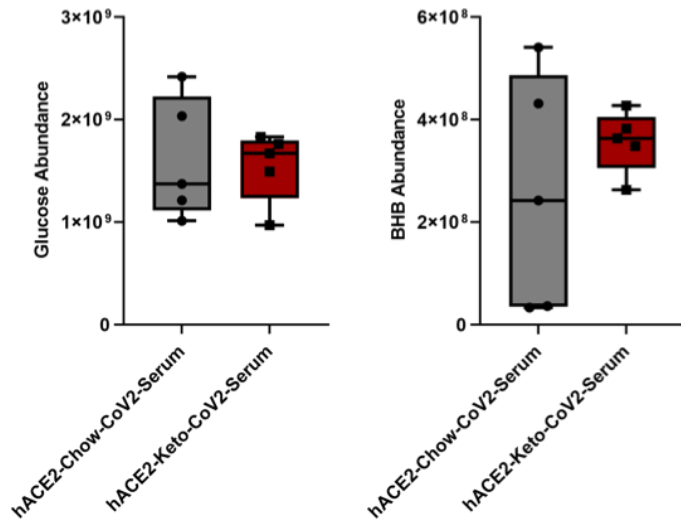

**Supplementary Figure 4.** Glucose and  $\beta$ -hydroxybutyrate (BHB) levels in mice serum in CD or KD SARS-CoV2 infected mice ( $n=5$ /group, significance threshold  $p < 0.05$ ).

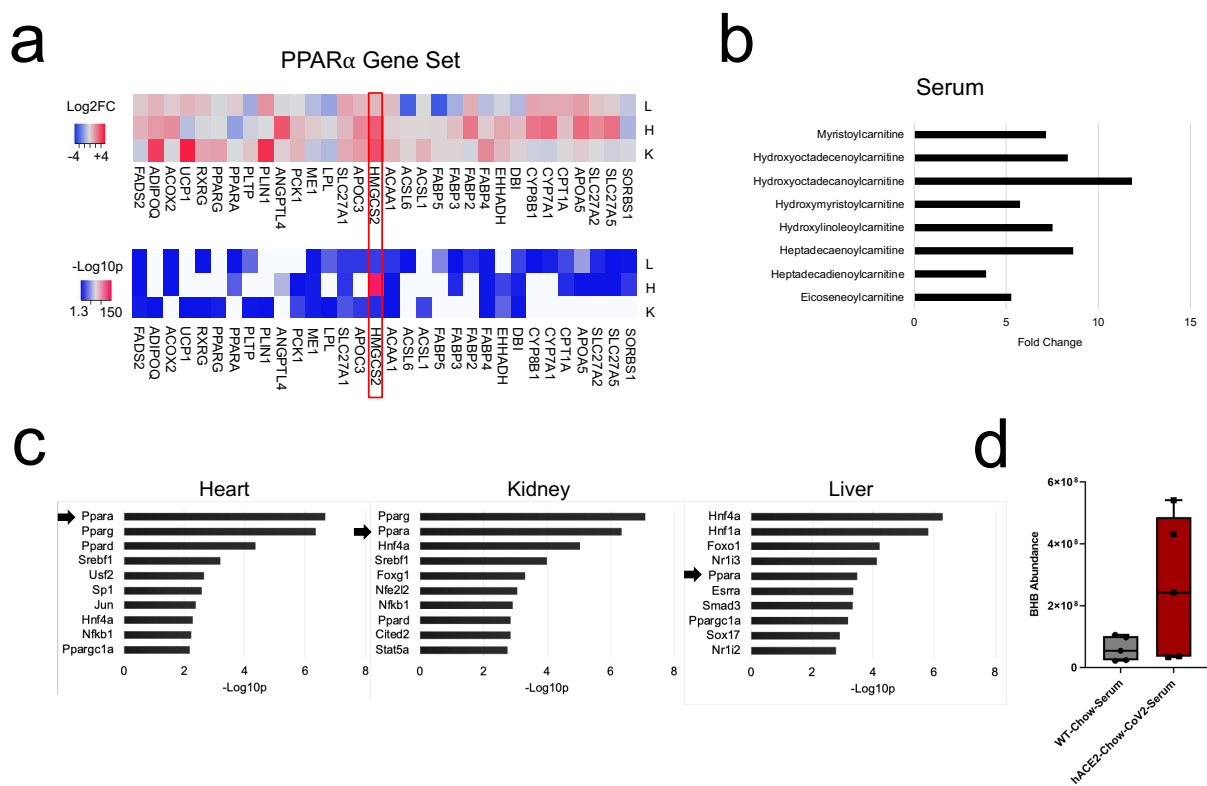

**Supplementary Figure 5. a)** PPAR $\alpha$  gene set enrichment analysis for liver, heart and kidney tissues at 7 days from infection showing significant up regulation of hydroxymethylglutaryl-CoA synthase 2 (HMGCS2) across all tissues in CD mice ( $n=3/\text{group}$ ,  $p < 0.05$  and fold change  $> |1|$ ); **b)** fold change of acylcarnitine abundances in mice liver after 7 days from infection in CD (significance  $p < 0.05$ , fold change  $> |2|$ ) ( $n=5/\text{group}$ ); **c)** transcriptional regulatory network analysis of RNA-sequencing data (first 500 DEGs ranked according to adjusted significance  $p$  value) from mice liver, heart, and kidney, after 7 days from infection with SARS-CoV2, constructed using the TRRUST v2 dataset. Bars represent  $-\log_{10}$  of transcriptional regulatory network significance, arrows highlight the PPAR $\alpha$  transcriptional regulatory network for each tissue ( $n=3/\text{group}$ ); **d)** serum levels of 3 $\beta$ -hydroxybutyrate (BHB) after 7 days from infection in CD mice ( $n=5/\text{group}$ ).

| Hearth KD      | CoV-2 vs CD | CoV-2  |                                                                                              |  |                                                                                                                                                 |
|----------------|-------------|--------|----------------------------------------------------------------------------------------------|--|-------------------------------------------------------------------------------------------------------------------------------------------------|
| Direction      | adj.Pval    | nGenes | Pathways                                                                                     |  | Genes                                                                                                                                           |
| Down regulated | 0.00116021  | 11     | Defense response                                                                             |  | Timp1, Hmox1, Adam8, Lcn2, Lrp8, Clec4d, Ccl2, Thbs1, Chl3, Mmp12, Lgals3,                                                                      |
| Down regulated | 0.00116021  | 3      | Eosinophil migration                                                                         |  | Adam8, Ccl2, Lgals3                                                                                                                             |
| Down regulated | 0.00217031  | 10     | Regulation of immune system process                                                          |  | Hmox1, Fstl3, Adam8, Lrp8, Gpnmb, Clec4d, Ccl2, Thbs1, Mmp12, Lgals3                                                                            |
| Down regulated | 0.00217031  | 7      | Regulation of leukocyte activation                                                           |  | Hmox1, Adam8, Gpnmb, Clec4d, Ccl2, Thbs1, Lgals3                                                                                                |
| Down regulated | 0.00312756  | 6      | Wound healing                                                                                |  | Timp1, Hmox1, Tnc, Ccl2, Thbs1, Mmp12                                                                                                           |
| Down regulated | 0.00453005  | 3      | Regulation of extrinsic apoptotic signaling pathway via death domain receptors               |  | Hmox1, Thbs1, Lgals3                                                                                                                            |
| Down regulated | 0.00453005  | 4      | Regulation of tumor necrosis factor superfamily cytokine production                          |  | Adam8, Gpnmb, Ccl2, Thbs1                                                                                                                       |
| Down regulated | 0.00453005  | 2      | Regulation of blood vessel endothelial cell proliferation involved in sprouting angiogenesis |  | Hmox1, Thbs1                                                                                                                                    |
| Down regulated | 0.00453005  | 8      | Regulation of cell motility                                                                  |  | Timp1, Hmox1, Adam8, Gpnmb, Ccl2, Thbs1, Mmp12, Lgals3                                                                                          |
| Down regulated | 0.00453005  | 5      | Negative regulation of cell adhesion                                                         |  | Adam8, Tnc, Gpnmb, Thbs1, Mmp12                                                                                                                 |
| Down regulated | 0.00453005  | 9      | Response to biotic stimulus                                                                  |  | Ankrd1, Adam8, Lcn2, Lrp8, Clec4d, M2, Ccl2, Mmp12, Lgals3                                                                                      |
| Down regulated | 0.00453005  | 8      | Cell activation                                                                              |  | Timp1, Hmox1, Adam8, Gpnmb, Clec4d, Ccl2, Thbs1, Lgals3                                                                                         |
| Down regulated | 0.00453005  | 7      | Regulation of cell adhesion                                                                  |  | Fstl3, Adam8, Tnc, Gpnmb, Ccl2, Thbs1, Mmp12                                                                                                    |
| Down regulated | 0.00453005  | 2      | Wound healing involved in inflammatory response                                              |  | Timp1, Hmox1                                                                                                                                    |
| Down regulated | 0.00453005  | 2      | Eosinophil chemotaxis                                                                        |  | Ccl2, Lgals3                                                                                                                                    |
| Up regulated   | 1.80E-06    | 11     | Steroid metabolic process                                                                    |  | Cyp17a1, Ear1, Srd5a1, Soat2, Tm7sf2, Hmgcs2, Hnf1a, Scd1, Serpina12, Dhcr7, Saa1                                                               |
| Up regulated   | 9.11E-05    | 7      | Cholesterol metabolic process                                                                |  | Soat2, Tm7sf2, Hmgcs2, Hnf1a, Serpina12, Dhcr7, Saa1                                                                                            |
| Up regulated   | 0.00011135  | 20     | Small molecule metabolic process                                                             |  | Cyp17a1, Acaca, Srd5a1, Soat2, Acat2, Tm7sf2, Dhkd1, Hmgcs2, Hnf1a, Bco2, Amt, Scd1, Serpina12, Nage, Dhcr7, Cyp2c70, Gdf2, Cyp4f15, Saa1, Urad |
| Up regulated   | 0.00071679  | 6      | Steroid biosynthetic process                                                                 |  | Cyp17a1, Srd5a1, Tm7sf2, Hmgcs2, Hnf1a, Dhcr7                                                                                                   |
| Up regulated   | 0.00189709  | 13     | Cellular lipid metabolic process                                                             |  | Ear1, Acaca, Srd5a1, Soat2, Acat2, Hmgcs2, Hnf1a, Plk3c2g, Bco2, Scd1, Serpina12, Cyp2c70, Cyp4f15                                              |
| Up regulated   | 0.00307265  | 9      | Organic hydroxy compound metabolic process                                                   |  | Srd5a1, Soat2, Tm7sf2, Hmgcs2, Hnf1a, Serpina12, Dhcr7, Cyp4f15, Saa1                                                                           |
| Up regulated   | 0.00421454  | 5      | Olefinic compound metabolic process                                                          |  | Cyp17a1, Srd5a1, Bco2, Cyp2c70, Cyp4f15                                                                                                         |

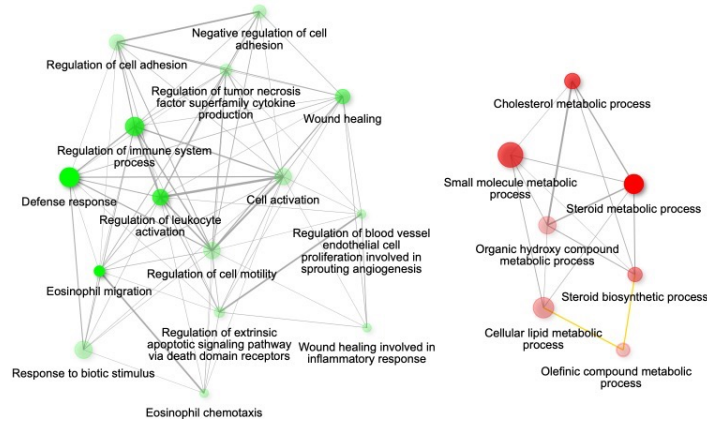

**Supplementary Figure 6.** GO gene set network enrichment analysis of differentially regulated genes in RNA-sequencing data in heart in SARS-CoV2 infected mice (KD vs CD). Enrichment analysis for DEGs was performed using the DESeq2 method with FDR cutoff 0.1 and minimum fold change 2, and gene sets from the GO Biological Process repository. Two nodes (pathways) are connected if they share >30% genes, red represents up regulated pathways, darker nodes are more significantly enriched gene sets, bigger nodes represent larger gene sets, ticker edges represent more overlapping genes.



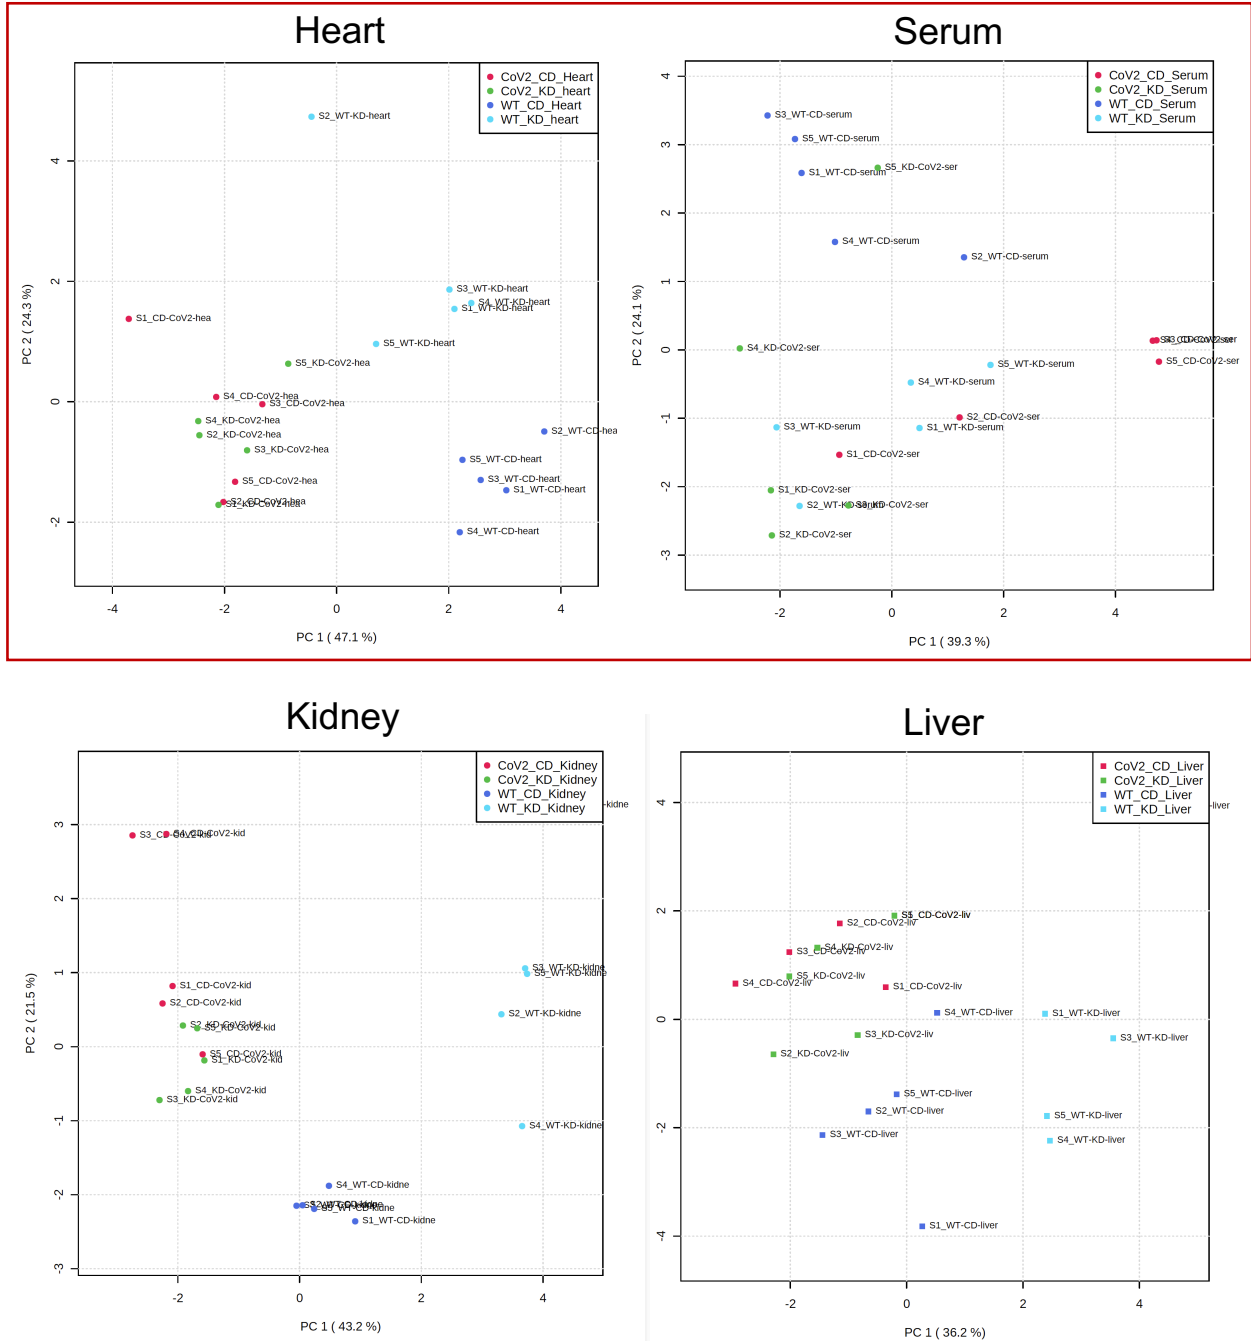

**Supplementary Figure 7.** Principal component analysis of metabolomics data showing significant changes in at least one tissue/condition ( $p < 0.05$  and  $FC > |1|$ ) for heart, serum, kidney, and liver in SARS-CoV-2 infected/uninfected (control) mice under KD or CD ( $n=5$ /group).

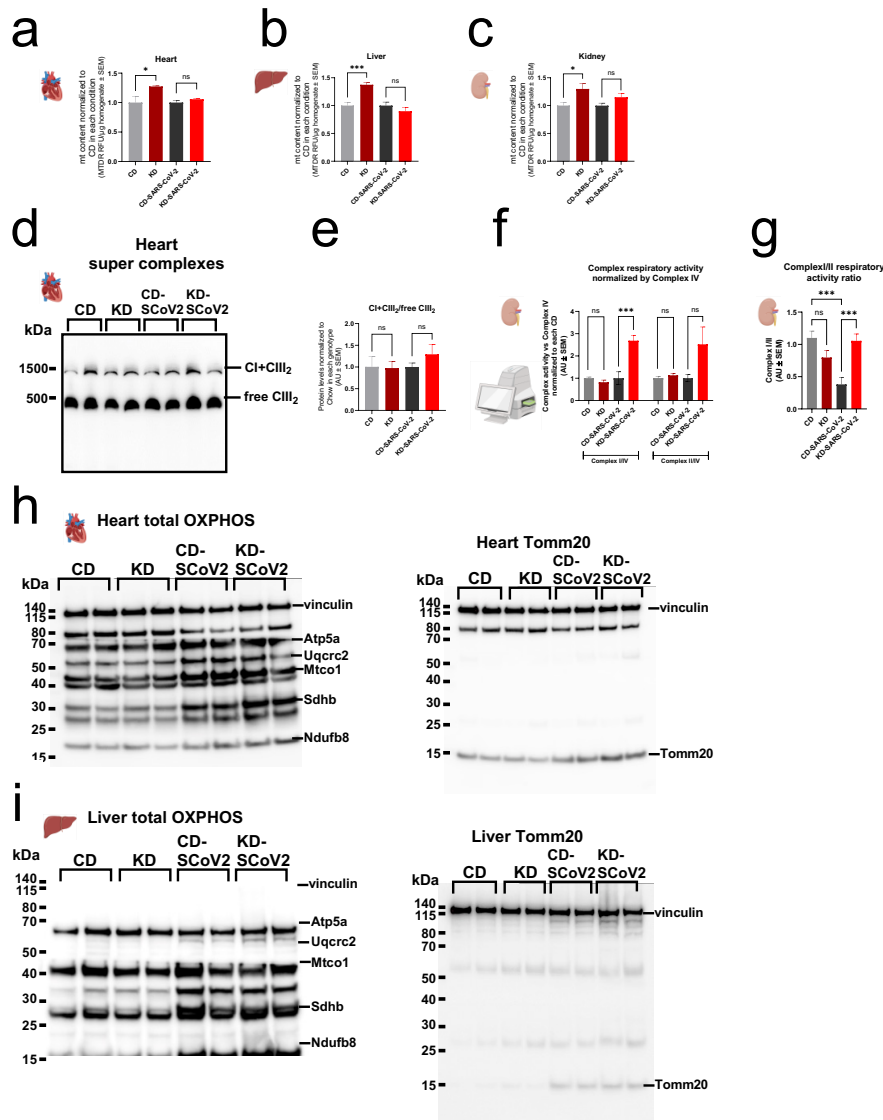

**Supplementary Figure 8.** Mitochondrial mass analysis in **a)** heart, **b)** liver, **c)** kidney. **d)** Immunoblot of blue native gel electrophoresis stained for Uqcrc2 in the heart. **e)** Quantification of assembled CI+CIII<sub>2</sub> versus unassembled CIII<sub>2</sub> respirasome ratios in the heart normalized to each CD condition. Graphs represent mean ±SEM of N=4 biological replicates. **f)** Respiratory activity of complexes I and II normalized by complex IV and each CD condition in the kidney measured by RIFS. Graphs represent mean ±SEM of N=5-10 biological replicates. **g)** Respiratory ratios of complex I/II in the kidney. Graphs represent mean ±SEM of N=5-10 biological replicates. **h, i)** Whole membrane images of total OXPHOS staining (complex I=Ndufb8, complex II=Sdhd, complex III=Uqcrc2, complex IV=Mtco1, complex V=Atp5a, Tomm20) and vinculin from heart and liver. Statistical significance for pairwise comparisons in A, B, C, E, and F was determined using unpaired 2-tailed Student's t-test or Mann-Whitney test where appropriate. Statistical significance of group comparisons in G was determined by One-way ANOVA with Holm-Šidák's multiple comparisons test. \* = p < 0.05, \*\* = p < 0.01, \*\*\* = p < 0.001.

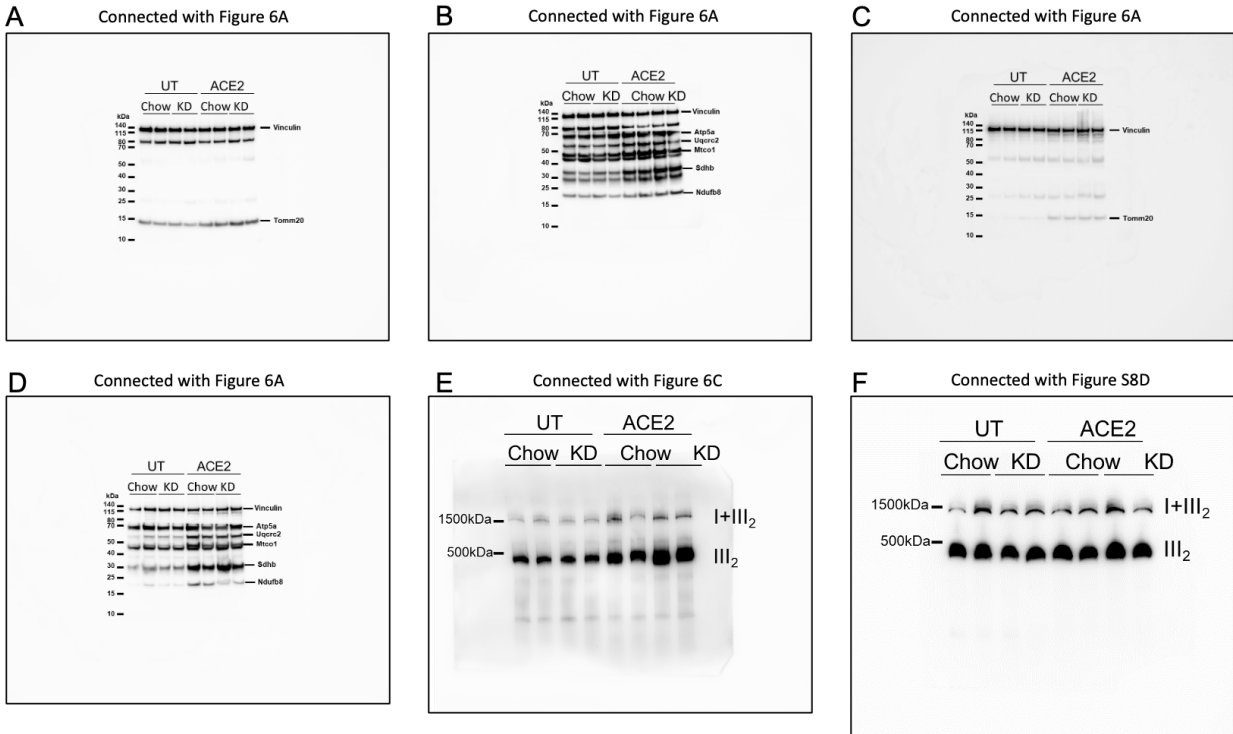

**Supplementary Figure 9. a-f) uncropped seahorse immunoblots.**

| (CoV+ vs Mock) CD |             |            |             |            |             |            |
|-------------------|-------------|------------|-------------|------------|-------------|------------|
| Gene              | Liver       |            | Kidney      |            | Heart       |            |
|                   | log2FoldCha | padj       | log2FoldCha | padj       | log2FoldCha | padj       |
| App               | -0.3423153  | 0.00483703 | -0.238524   | 0.0054805  | -0.0446387  | 0.7856388  |
| Casp1             | -0.1093449  | 0.7651363  | 0.818861    | 0.03854891 | 0.3002827   | 0.5885465  |
| Hsp90ab1          | 0.3233307   | 0.03626698 | -0.5408839  | 3.5627E-07 | -0.195772   | 0.09447505 |
| Mefv              | -0.1652302  | 0.8009388  | 0.1839004   | 0.9303023  | -1.627225   | 0.3714338  |
| Nlrp3             | 0.5238939   | 0.2897234  | 0.3420884   | 0.6782744  | 0.1504231   | 0.8987734  |
| P2rx7             | -0.3889939  | 0.1690553  | 0.2183965   | 0.5485049  | -0.1858189  | 0.5549637  |
| Panx1             | -0.1365616  | 0.890656   | 0.3118183   | 0.6757288  | 0.01509982  | 0.9867074  |
| Pstpip1           | 0.5233991   | 0.6164818  | -0.0121071  | 0.9899481  | 0.07730529  | 0.9294771  |
| Pycard            | -0.2876032  | 0.6650046  | 0.08115971  | 0.8126235  | -0.8352595  | 0.0025423  |
| Sugt1             | -0.0480264  | 0.8199031  | -0.14305    | 0.2834837  | 0.1887355   | 0.274736   |
| Txn1              | 0.1468964   | 0.3849401  | -0.011905   | 0.9402218  | 0.3965358   | 0.01726207 |
| Txnip             | -0.7109239  | 0.00205565 | 0.94375542  | 5.1151E-17 | 1.358478    | 0.00560716 |

  

| (CoV+ vs Mock) KD |             |            |             |            |             |           |
|-------------------|-------------|------------|-------------|------------|-------------|-----------|
| Gene              | Liver       |            | Kidney      |            | Heart       |           |
|                   | log2FoldCha | padj       | log2FoldCha | padj       | log2FoldCha | padj      |
| App               | -0.0900725  | 0.6216856  | -0.2873438  | 0.00158866 | -0.1307284  | 0.6251281 |
| Casp1             | 0.95826911  | 0.00050974 | 1.3639762   | 0.00229168 | 0.2272381   | 0.7156191 |
| Hsp90ab1          | 0.1536993   | 0.2454463  | -0.4073162  | 9.59E-06   | -0.0437195  | 0.851374  |
| Mefv              | 0.6655186   | 0.5156681  | -0.0239098  | 0.5        | -0.1954177  | 0.5       |
| Nlrp3             | 1.49572097  | 9.37E-05   | 0.3343609   | 0.7462106  | 0.6352095   | 0.6748814 |
| P2rx7             | -0.0481552  | 0.9063406  | -0.1650734  | 0.6885929  | -0.1651845  | 0.790371  |
| Panx1             | 0.6544571   | 0.3913517  | 0.7336121   | 0.2883224  | 0.07396773  | 0.9536502 |
| Pstpip1           | 0.7776461   | 0.3616439  | -0.0733855  | 0.9357134  | 0.3401629   | 0.7749411 |
| Pycard            | 0.3681263   | 0.5261097  | 0.60198056  | 0.00701464 | -0.4982977  | 0.3441938 |
| Sugt1             | 0.0060055   | 0.9828179  | 0.1892025   | 0.1758379  | -0.0574606  | 0.8659103 |
| Txn1              | -0.2943571  | 0.03422323 | 0.01261635  | 0.9539017  | -0.0863247  | 0.8135332 |
| Txnip             | -0.3579914  | 0.3803984  | 0.1414272   | 0.3366593  | 0.1910114   | 0.3029226 |

  

| (CoV+ KD vs Mock CD) |             |            |             |            |             |            |
|----------------------|-------------|------------|-------------|------------|-------------|------------|
| Gene                 | Liver       |            | Kidney      |            | Heart       |            |
|                      | log2FoldCha | padj       | log2FoldCha | padj       | log2FoldCha | padj       |
| App                  | -0.0458794  | 0.9442773  | 0.00017191  | 0.9997431  | 0.00694549  | 0.9974641  |
| Casp1                | 0.83098482  | 0.0273742  | 0.4409857   | 0.7344761  | 0.06868844  | 0.9783912  |
| Hsp90ab1             | -0.0203087  | 0.9859957  | 0.24088217  | 0.30376346 | 0.08495171  | 0.8707698  |
| Mefv                 | -0.6621344  | 0.5        | -0.5956393  | 0.5        | -0.1259762  | 0.5        |
| Nlrp3                | 0.3953297   | 0.7403654  | 0.06067101  | 0.5        | 0.15296     | 0.9728533  |
| P2rx7                | 0.2412895   | 0.8244944  | -0.1564205  | 0.9482943  | -0.0603667  | 0.9783419  |
| Panx1                | 0.6120604   | 0.5        | 0.3964755   | 0.5        | 0.01937028  | 0.9974641  |
| Pstpip1              | 0.7151182   | 0.5        | 0.02577697  | 0.9972775  | -0.3726863  | 0.8546449  |
| Pycard               | 0.94850844  | 0.31653556 | 0.2420692   | 0.8535377  | -0.3919385  | 0.7044471  |
| Sugt1                | 0.09159173  | 0.9126346  | 0.1262393   | 0.848884   | -0.0975446  | 0.9137739  |
| Txn1                 | 0.1465255   | 0.778751   | -0.0745583  | 0.937866   | -0.0020518  | 0.9997147  |
| Txnip                | -0.0101596  | 0.9941421  | -0.0766517  | 0.946901   | -0.2102992  | 0.34853195 |

**Supplementary Figure 10.** NLRP3 inflammasome transcriptional gene set analysis for infected mice under CD or KD. In red:  $p < 0.05$  ( $n=3$ ).
